# Supplementary material for: Kinetics of Zn2+ complexation by a ditopic phenanthroline-azamacrocyclic scorpiand-like receptor
Source: Royal Society of Chemistry journal article supplement (doi:10.1039/c2cc16831f), 2011-12-16
Supplement: c2cc16831f.pdf [file c2cc16831f.pdf]

## Supplementary material

### **Kinetics of Zn(II) complexation by a ditopic phenanthroline-azamacrocyclic scoriand-like receptor**

Jorge González, Raquel Gavara, Óscar Gadea, Enrique García-España and Fernando Pina

#### **S1. Synthesis of compound L**

#### **S2. NMR measurements**

#### **S3. EMF measurements**

#### **S4. UV-Vis and fluorescence experiments**

#### **S5. Stopped-flow experiments**

**Table S1.** Logarithms of the stepwise protonation constants for the protonation of L determined in  $0.15 \text{ mol dm}^{-3}$  NaCl at 298.1 K

**Table S2.** Logarithms of the cumulative stability constants for the formation complexes of  $\text{Zn}^{2+}$  with L calculated in  $0.15 \text{ mol} \cdot \text{dm}^{-3}$  NaCl at  $298.1 \pm 0.1$  K.

**Fig. S1.** Distribution diagram for the protonation of L with the chemical shift of its spectra in  $\text{D}_2\text{O}$  to several pD values

**Fig. S2.** UV-Vis spectral variations occurring upon addition of 2 eq of  $\text{Zn}^{2+}$  to a solution of compound L (traced line) at pH = 8. The spectrum obtained immediately after (8s) the addition of the metal (0) is indicated. (Conditions:  $[\text{L}] = 2.5 \times 10^{-5} \text{ M}$ ;  $[\text{NaCl}] = 0.15 \text{ M}$ ; 5% universal buffer).

**Fig. S3.** Distribution diagrams of the species for the  $\text{L}:\text{Zn}^{2+}$  systems as a function of pH in aqueous solution in 0.15 M NaCl at 298.1 K;  $[\text{L}] = 1 \times 10^{-3} \text{ M}$ . (a)  $[\text{Zn}^{2+}] = 1 \times 10^{-3} \text{ M}$ ; (b)  $[\text{Zn}^{2+}] = 2 \times 10^{-3} \text{ M}$ .

**Fig. S4.** UV-Vis kinetic traces at 267 nm for 1:1 (A) and 2:1 (B) molar ratios ( $\text{Zn}^{2+}:\text{L}$ ). The percentage of absorbance variation is plotted against time and the traces corresponding to two different concentrations of L ( $5 \times 10^{-5} \text{ M}$  and  $1.25 \times 10^{-5} \text{ M}$ ) are shown. (Conditions:  $[\text{NaCl}] = 0.15 \text{ M}$ ; 5% universal buffer, pH = 8).

**Fig. S5.** Fluorescence kinetic traces at 365 nm ( $\lambda_{\text{exc}} = 268 \text{ nm}$ ) for 1:1 and 2:1 molar ratios ( $\text{Zn}^{2+}:\text{L}$ ). (Conditions:  $[\text{L}] = 6 \times 10^{-6} \text{ M}$ ;  $[\text{NaCl}] = 0.15 \text{ M}$ ; 5% universal buffer, pH = 8).

**Fig. S6.** Changes in emission for 1,10-phenanthroline ( $\lambda_{\text{exc}} = 268 \text{ nm}$ ) upon complexation of  $\text{Zn}^{2+}$  at pH 6.5.

**Fig S7.** Plot of the crystal structure of a  $\text{Zn}^{2+}$  complex of a related monoprotonated macrocycle without fluorophore group ( $[\text{Zn}(\text{HL})\text{Br}][\text{ZnBr}_4]_2 \cdot \text{H}_2\text{O}$ ) showing the coordination of the metal ion to the macrocycle.

### S1. Synthesis of compound L.

5-(2-Aminoethyl)-2,5,8-triaza[12]-2,6-pyridinophane<sup>1</sup> (0.29 g, 1.16 mmol) and 4-carboxaldehyde-2,9-phenanthroline (0.241 g, 1.16 mmol) were dissolved in 40 mL anhydrous ethanol and the mixture was stirred for 2 h at room temperature. NaBH<sub>4</sub> (0.438 g, 11.6 mmol) was then added and the resulting solution stirred for 2 h at room temperature. The ethanol was removed under reduced pressure. The resulting residue was treated with H<sub>2</sub>O (10 mL) and extracted with CH<sub>2</sub>Cl<sub>2</sub> (3x20 mL). The organic phase was removed at reduced pressure, and the resulting residue was dissolved in ethanol and precipitated as hydrochloride salt of L in 60 % yield.

<sup>1</sup>H NMR (500 MHz, D<sub>2</sub>O): δ (ppm) = 8.69 (d, J = 5 Hz, 1H), 8.67 (d, J = 4 Hz, 1H), 8.12 (d, J = 8 Hz, 1H), 7.86 (t, J = 8 Hz, 1H), 7.67 (d, J = 4 Hz, 1H), 7.58 (dd, J<sub>1</sub> = 8 Hz, J<sub>2</sub> = 5 Hz, 1H), 7.52 (d, J = 8 Hz, 1H), 7.35 (d, J = 8 Hz, 2H), 7.33 (d, J = 8 Hz, 1H), 4.62 (s, 2H), 4.55 (s, 4H), 3.44 (t, J = 7 Hz, 2H), 3.26-3.18 (m, 4H), 3.09 (t, J = 7 Hz, 2H), 2.89 (t, J = 5 Hz, 4H).

<sup>13</sup>C NMR (125 MHz, D<sub>2</sub>O): δ (ppm) = 149.35, 148.95, 147.59, 141.41, 140.31, 139.89, 139.65, 128.01, 126.03, 124.28, 122.06, 121.56, 51.01, 50.56, 49.57, 46.82, 45.94, 44.18.

Calc for C<sub>26</sub>N<sub>7</sub>H<sub>31</sub>·4HCl 6.2H<sub>2</sub>O: C, 44.6, H, 6.8, N, 14.0. Found: C, 44.6, H, 6.7, N, 14.1. MS (FAB) m/z 442 [M+H]<sup>+</sup>.

### S2. NMR measurements.

The <sup>1</sup>H and <sup>13</sup>C spectra were recorded on a Bruker AV 500 spectrometer at 500 MHz for <sup>1</sup>H and 125.72 MHz for <sup>13</sup>C. The chemical shifts were recorded in ppm. All spectra were recorded at room temperature and the concentration of L·4HCl 6.2H<sub>2</sub>O was 2 mM in D<sub>2</sub>O and the [Zn<sup>2+</sup>] was kept between 2-4 mM. The pD was adjusted with a concentrated solution of DCl or NaOD in D<sub>2</sub>O.

### S3. EMF measurements

The potentiometric titrations were carried out at 298.1 ± 0.1 K using NaCl 0.15 M as supporting electrolyte. The experimental procedure (burette, potentiometer, cell, stirrer, microcomputer, etc.) has been fully described elsewhere.<sup>2</sup> The acquisition of the EMF data was performed with the computer program PASAT.<sup>3</sup> The reference electrode was an Ag/AgCl electrode in saturated KCl solution. The glass electrode was calibrated as a hydrogen ion concentration probe by titration of previously standardized amounts of HCl with CO<sub>2</sub>-free NaOH solutions and the equivalent point determined by the Gran's method,<sup>4</sup> which gives the standard potential, E<sup>o</sup>, and the ionic product of water (pK<sub>w</sub> = 13.73(1)).

The computer program HYPERQUAD was used to calculate the protonation and stability constants.<sup>5</sup> The HYSS<sup>6</sup> program was used to obtain the distribution diagrams. The pH range investigated was 2.5-11.0. In the binary Zn<sup>2+</sup>-L system, the concentration of Zn<sup>2+</sup> and the ligand ranged from 1x10<sup>-3</sup> to 5x10<sup>-3</sup> mol dm<sup>-3</sup> with Zn<sup>2+</sup>:L molar ratios varying from 2:1 to 1:2. The titration curves for each system (at least two titrations, ca. 200 experimental) were treated either as a single set or as separated curves without significant variations in the values of the stability

<sup>1</sup> B. Verdejo, A. Ferrer, S. Blasco, C. E. Castillo, J. González, J. Latorre, M. A. Mañez, M. G. Basallote, C. Soriano and E. García-España, *Inorg. Chem.*, 2007, **46**, 5707.

<sup>2</sup> E. García-España, M. J. Ballester, F. Lloret, J. M. Moratal, J. Faus, A. Bianchi, *J. Chem. Soc., Dalton Trans.*, 1988, 101.

<sup>3</sup> M. Fontanelli, M. Micheloni, *Proceedings of the I Spanish-Italian Congress on Thermodynamics of Metal Complexes*, Peñíscola, Castellón, 1990. Program for the automatic control of the microburette and the acquisition of the electromotive force readings.

4 (a) G. Gran, *Analyst*, 1952, **77**, 661; (b) F. J. Rossotti, H. Rossotti, *J. Chem. Educ.*, 1965, **42**, 375.

5 P. Gans, A. Sabatini, A. Vacca, *Talanta*, 1996, **43**, 1739.

6 P. Gans, *Programs to determine the distribution of species in multiequilibria systems from the stability constants and mass balance equations*.

constants. When more than one model could fit the experimental data, the most reliable chemical model was chosen by performing F tests at the 0.05 confidence level.<sup>7</sup>

#### S4. UV-Vis and fluorescence measurements

Solutions were prepared using Millipore water, with NaCl 0.15 M as supporting electrolyte, and using 5% (v/v) of the universal buffer of Theorell and Stenhagen<sup>8</sup> at the appropriate pH value. The absorption and emission measurements were carried out at 294.1 K using both a CARY 100Bio spectrophotometer and a Jobin Yvon Spex, Fluorolog FL3-22 spectrofluorimeter respectively. In the kinetic experiments, a solution of compound L at pH = 8 was treated with 1 or 2 eq of Zn<sup>2+</sup>, proceeding from a concentrated solution of the metal at the same pH value. The fluorescence kinetic experiments were recorded by exciting at 268 nm and collecting the emission at 365 nm. The measured spectral changes were analyzed and fitted using the tool SOLVER provided by Microsoft Office EXCEL 2003.

#### S5. Stopped-flow experiments

The measurements were carried out at 294.1 K with an Applied Photophysics SX20 stopped-flow spectrometer provided with a PDA.1/UV photodiode array. Solutions were prepared with Millipore water, the ionic strength was fixed using NaCl 0.15 M and the pH was controlled by employing 5% (v/v) of the universal buffer of Theorell and Stenhagen at the appropriate pH value. In the experiments, a solution of the compound L at pH = 8 was mixed in the stopped-flow instrument with a solution of Zn<sup>2+</sup> in 1:1 or 2:1 molar ratio (M:L) at the same pH value. The measured spectral changes were analyzed and fitted to a second order reaction with the tool SOLVER provided by Microsoft Office EXCEL 2003.

**Table S1** Logarithms of the stepwise protonation constants for the protonation of L determined in 0.15 mol dm<sup>-3</sup> NaCl at 298.1 K.

| Reaction <sup>a</sup>                   | L                    |
|-----------------------------------------|----------------------|
| H + L = HL                              | 9.39(2) <sup>b</sup> |
| H + HL = H <sub>2</sub> L               | 7.39(3)              |
| H + H <sub>2</sub> L = H <sub>3</sub> L | 5.27(2)              |
| H + H <sub>3</sub> L = H <sub>4</sub> L | 3.44(4)              |
| Log β <sup>c</sup>                      | 25.49                |

<sup>a</sup>Charges omitted for clarity. <sup>b</sup>Values in parentheses are standard deviation in the last significant figure. <sup>c</sup>log β = Σ log K

**Table S2.** Logarithms of the cumulative stability constants for the formation complexes of Zn<sup>2+</sup> with L calculated in 0.15 mol·dm<sup>-3</sup> NaCl at 298.1 ± 0.1 K.

| Reaction <sup>a</sup>                                        | L        |
|--------------------------------------------------------------|----------|
| H + Zn + L ⇌ ZnHL                                            | 17.88(4) |
| Zn + L ⇌ ZnL                                                 | 12.48(3) |
| Zn + L + H <sub>2</sub> O ⇌ ZnL(OH) + H                      | 3.52(6)  |
| Zn + L + 2H <sub>2</sub> O ⇌ ZnL(OH) <sub>2</sub> + 2H       | -6.95(5) |
| 2Zn + L ⇌ Zn <sub>2</sub> L                                  | 17.60(4) |
| 2Zn + L + H <sub>2</sub> O ⇌ Zn <sub>2</sub> L(OH) + H       | 1.45(5)  |
| 2H + Zn + 2L ⇌ Zn <sub>2</sub> H <sub>2</sub> L <sub>2</sub> | 34.27(6) |

<sup>a</sup>Charges omitted. <sup>b</sup>Values in parenthesis show standard deviation in the last significant figure.

7 (a) W. C. Hamilton, *Statistics in Physical chemistry*, The Ronald Press Co., New York, 1964. (b) L. Bologni, A. Sabatini, A. Vacca, *Inorg. Chim. Acta*, 1983, **69**, 71.

<sup>8</sup> F. W. Küster, A. Thiel, A. Ruland, *Tabelle per le Analisi Chimiche e Chimico-Fisiche*, 12th ed., Hoepli, Milano, 1982, pp. 157.

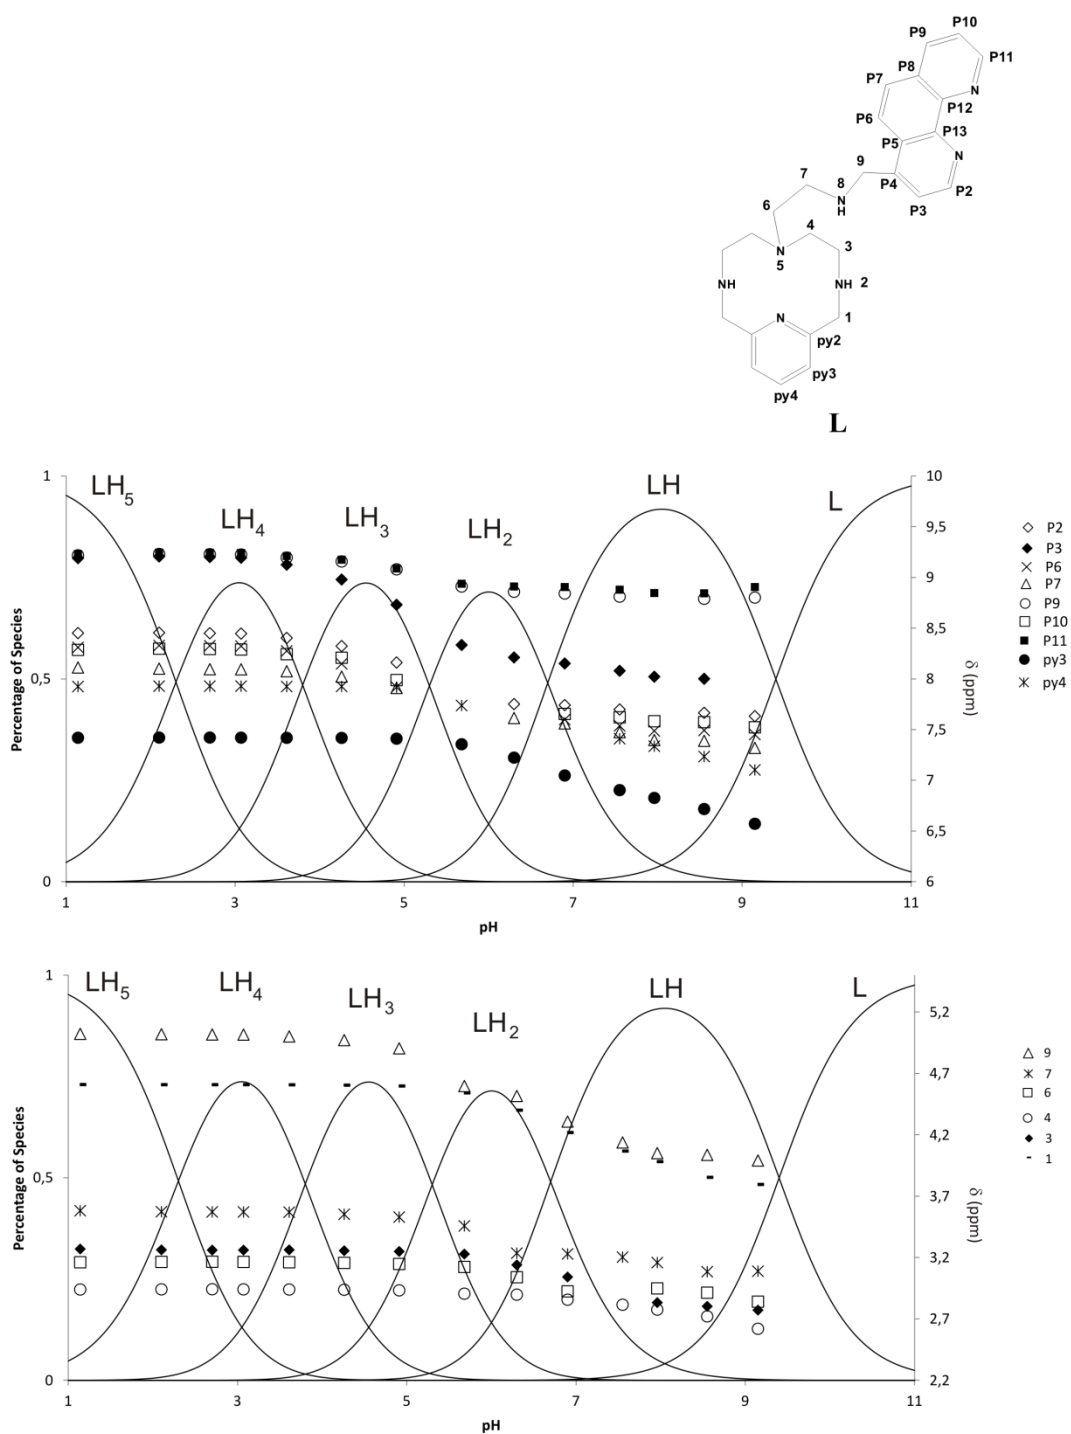

**Fig. S1.** Distribution diagram for the protonation of **L** with the chemical shift of its spectra in  $D_2O$  to several pD values.

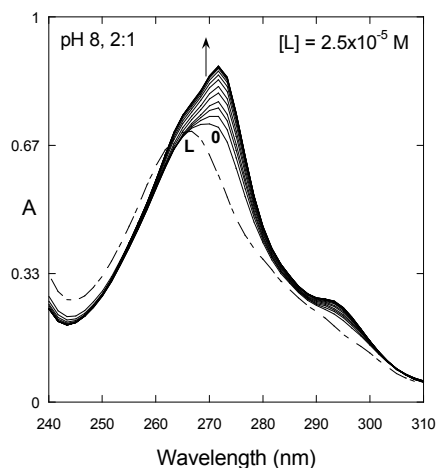

**Fig. S2.** UV-Vis spectral variations occurring upon addition of 2 eq of Zn<sup>2+</sup> to a solution of compound L (traced line) at pH = 8. The spectrum obtained immediately after (8s) the addition of the metal (0) is indicated. (Conditions: [L] = 2.5 × 10<sup>-5</sup> M; [NaCl] = 0.15 M; 5% universal buffer).

a)

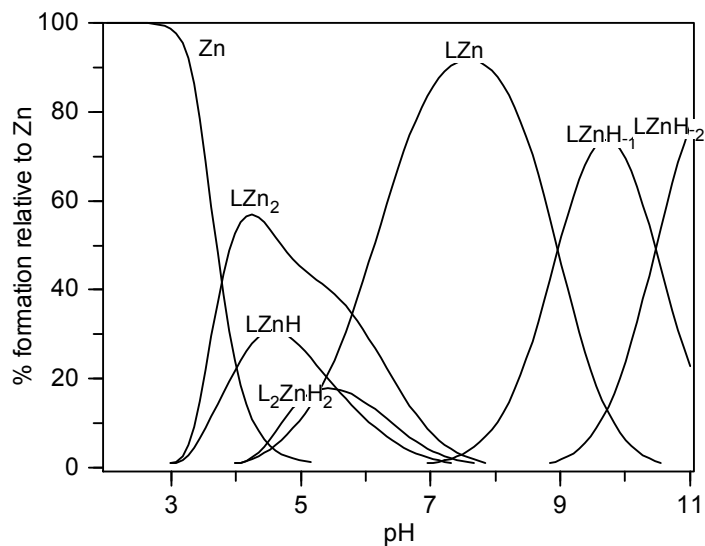

b)

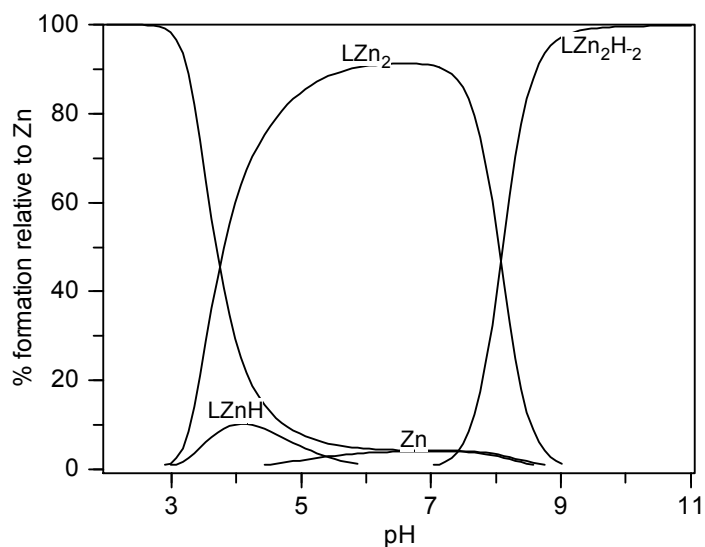

**Fig. S3.** Distribution diagrams of the species for the L:Zn<sup>2+</sup> systems as a function of pH in aqueous solution in 0.15 M NaCl at 298.1 K; [L] = 1 × 10<sup>-3</sup> M. (a) [Zn<sup>2+</sup>] = 1 × 10<sup>-3</sup> M; (b) [Zn<sup>2+</sup>] = 2 × 10<sup>-3</sup> M.

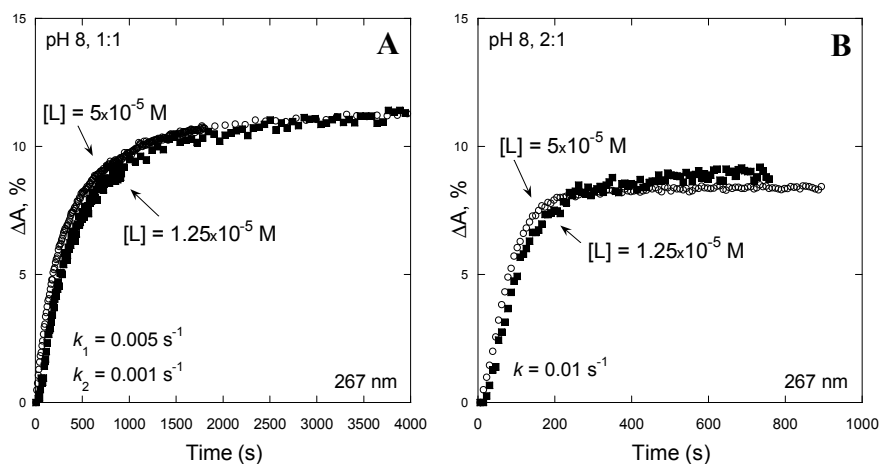

**Fig. S4.** UV-Vis kinetic traces at 267 nm for 1:1 (A) and 2:1 (B) molar ratios (Zn<sup>2+</sup>:L). The percentage of absorbance variation is plotted against time and the traces corresponding to two different concentrations of L (5 × 10<sup>-5</sup> M and 1.25 × 10<sup>-5</sup> M) are shown. (Conditions: [NaCl] = 0.15 M; 5% universal buffer, pH = 8).

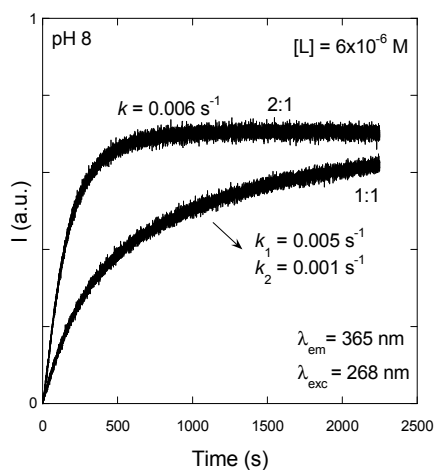

**Fig. S5.** Fluorescence kinetic traces at 365 nm (λ<sub>em</sub> = 268 nm) for 1:1 and 2:1 molar ratios (Zn<sup>2+</sup>:L). (Conditions: [L] = 6 × 10<sup>-6</sup> M; [NaCl] = 0.15 M; 5% universal buffer, pH = 8).

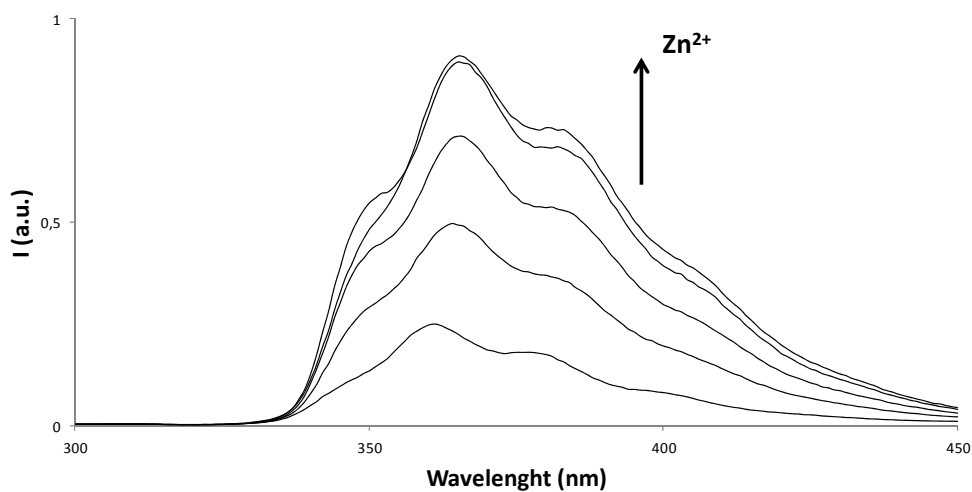

**Fig. S6.** Changes in emission for 1,10-phenanthroline (λ<sub>exc</sub> = 268 nm) upon complexation of Zn<sup>2+</sup> at pH 6.5.

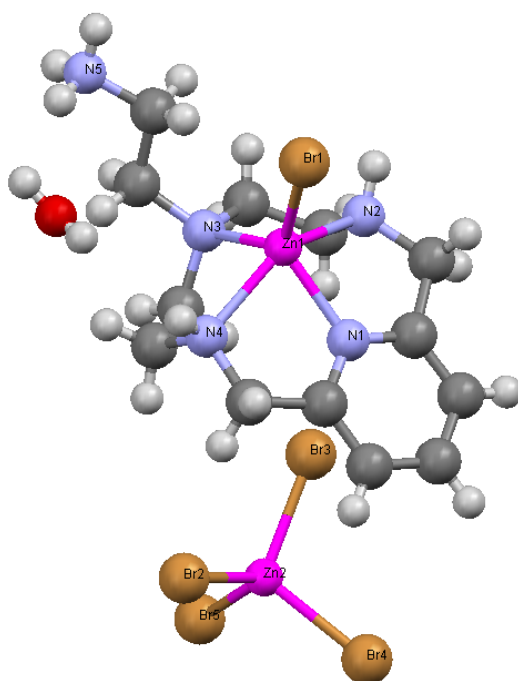

**Fig S7.** Plot of the crystal structure of a  $\text{Zn}^{2+}$  complex of a related monoprotonated macrocycle without fluorophore group ( $[\text{Zn}(\text{HL})\text{Br}][\text{ZnBr}_4]_2 \cdot \text{H}_2\text{O}$ ) showing the coordination of the metal ion to the macrocycle.
